# Supplementary material
Source: PubMed Central journal article supplement (PMC3573884)
Supplement: NIHMS434948-supplement-1.pdf [file NIHMS434948-supplement-1.pdf]

**Nevozhay\_SI**

**PDF format**

**Supplementary Figures S1-S7, Supplementary Tables S1-S2, Supplementary Notes 1-2, Supplementary Methods, and Supplementary References** showing the details of promoter construction and sequences, cloning procedures and oligonucleotides, computational model adaptation, control experiments, linearity assessment results and supplementary references.
